# Supplementary material for: Exacerbation of blast-induced ocular trauma by an immune response
Source: PubMed Central journal article supplement (PMC4264554; doi:10.1186/s12974-014-0192-5), 2014-11-29

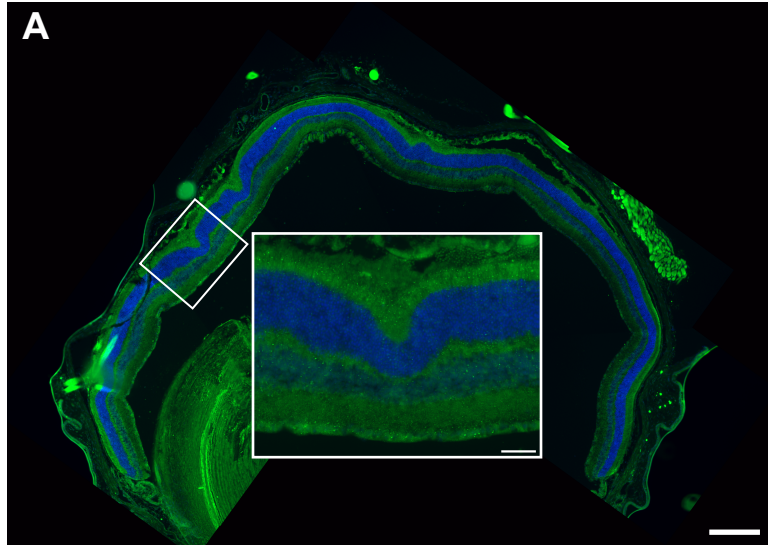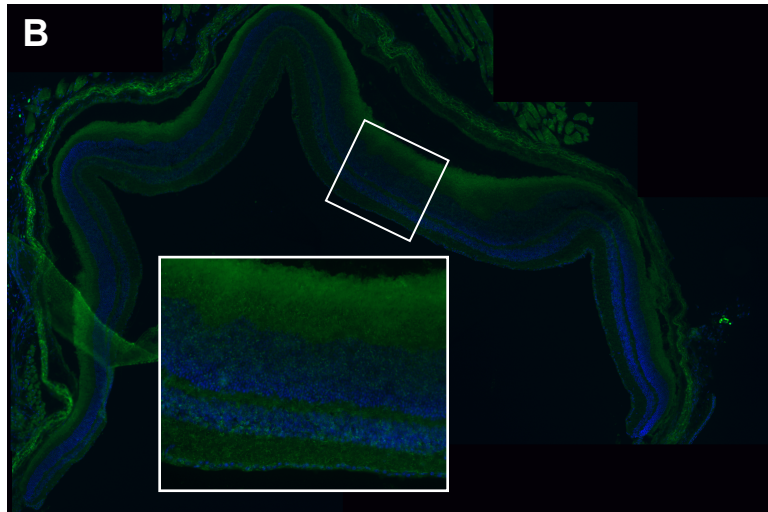

Supplement: 12974_2014_192_MOESM3_ESM.pdf [file 12974_2014_192_MOESM3_ESM.pdf]
